# Supplementary material for: Shotgun Sequencing Analysis of Trypanosoma cruzi I Sylvio X10/1 and Comparison with T. cruzi VI CL Brener
Source: PLoS Negl Trop Dis. 2011 Mar 8;5(3):e984. doi: 10.1371/journal.pntd.0000984 (PMC3050914; doi:10.1371/journal.pntd.0000984)
Supplement: Table S1 — Incomplete genes and incorrect pseudogenes in CL Brener. An Excel file containing three sheets: A) Genes in Esmeraldo (CL Brener) with sequence gaps and the corresponding ortholog in Sylvio X10/1. B) Genes in non-Esmeraldo (CL Brener) with sequence gaps and the corresponding ortholog in Sylvio X10/1. C) Pseudogenes in CL Brener that is likely to contain a sequencing or assembly error in this genome. (0.10 MB XLS) [file pntd.0000984.s002.xls]

## Sheet: NonEsmeraldo
Sylvio	NonEsmeraldo fragment 1	NonEsmeraldo fragment 2	Annotation
TCSYLVIO_150	Tc00.1047053507073.10	Tc00.1047053508319.79	hypothetical protein
TCSYLVIO_283	Tc00.1047053506983.10	Tc00.1047053508865.2	hypothetical protein
TCSYLVIO_292	Tc00.1047053511247.27	Tc00.1047053511249.4	RNA editing 3' terminal uridylyl transferase 1, putative
TCSYLVIO_308	Tc00.1047053506439.18	Tc00.1047053509935.10	hypothetical protein
TCSYLVIO_336	Tc00.1047053509939.19	Tc00.1047053506441.10	hypothetical protein
TCSYLVIO_385	Tc00.1047053509555.10	Tc00.1047053507619.10	hypothetical protein
TCSYLVIO_403	Tc00.1047053478283.10	Tc00.1047053509561.9	hypothetical protein
TCSYLVIO_424	Tc00.1047053441967.9	Tc00.1047053439301.9	hypothetical protein
TCSYLVIO_424	Tc00.1047053439301.9	Tc00.1047053509567.4	hypothetical protein
TCSYLVIO_455	Tc00.1047053509569.180	Tc00.1047053504093.4	hypothetical protein
TCSYLVIO_472	Tc00.1047053509573.60	Tc00.1047053473755.9	hypothetical protein
TCSYLVIO_564	Tc00.1047053511813.30	Tc00.1047053511815.4	proteasome regulatory ATPase subunit 5, putative
TCSYLVIO_618	Tc00.1047053511819.59	Tc00.1047053511821.10	dynein heavy chain, cytosolic, putative
TCSYLVIO_639	Tc00.1047053511823.79	Tc00.1047053511825.4	intraflagellar transport protein
TCSYLVIO_666	Tc00.1047053509211.39	Tc00.1047053511827.10	hypothetical protein
TCSYLVIO_701	Tc00.1047053506177.150	Tc00.1047053503395.59	hypothetical protein
TCSYLVIO_707	Tc00.1047053503395.10	Tc00.1047053507663.9	hypothetical protein
TCSYLVIO_732	Tc00.1047053511847.89	Tc00.1047053503837.40	hypothetical protein
TCSYLVIO_771	Tc00.1047053511857.80	Tc00.1047053511859.10	AMP deaminase, putative
TCSYLVIO_799	Tc00.1047053509683.130	Tc00.1047053506257.5	aminopeptidase, putative
TCSYLVIO_820	Tc00.1047053503999.10	Tc00.1047053509587.20	squalene monooxygenase, putative
TCSYLVIO_915	Tc00.1047053511881.40	Tc00.1047053503879.119	protein transport protein Sec24C, putative
TCSYLVIO_929	Tc00.1047053503539.10	Tc00.1047053503877.19	hypothetical protein
TCSYLVIO_981	Tc00.1047053509751.4	Tc00.1047053507793.60	hypothetical protein
TCSYLVIO_1005	Tc00.1047053506337.4	Tc00.1047053509749.39	short-chain dehydrogenase, putative
TCSYLVIO_1028	Tc00.1047053405737.4	Tc00.1047053506275.9	hypothetical protein
TCSYLVIO_1057	Tc00.1047053503823.169	Tc00.1047053504827.170	protein kinase, putative
TCSYLVIO_1076	Tc00.1047053509577.9	Tc00.1047053446067.9	hypothetical protein
TCSYLVIO_1076	Tc00.1047053446067.9	Tc00.1047053506155.130	hypothetical protein
TCSYLVIO_1100	Tc00.1047053510423.70	Tc00.1047053510425.10	hypothetical protein
TCSYLVIO_1105	Tc00.1047053506807.39	Tc00.1047053503997.10	hypothetical protein
TCSYLVIO_1123	Tc00.1047053510635.60	Tc00.1047053503663.4	hypothetical protein
TCSYLVIO_1209	Tc00.1047053509179.10	Tc00.1047053511763.19	carnitine O-acetyltransferase, putative
TCSYLVIO_1216	Tc00.1047053509177.10	Tc00.1047053509175.18	hypothetical protein
TCSYLVIO_1237	Tc00.1047053507087.10	Tc00.1047053503399.29	hydrolase-like protein, putative
TCSYLVIO_1268	Tc00.1047053511317.79	Tc00.1047053508909.10	OSM3-like kinesin, putative
TCSYLVIO_1299	Tc00.1047053508909.339	Tc00.1047053508911.10	hypothetical protein
TCSYLVIO_1311	Tc00.1047053508913.39	Tc00.1047053511321.4	O-sialoglycoprotein endopeptidase, putative
TCSYLVIO_1327	Tc00.1047053508915.9	Tc00.1047053508917.4	hypothetical protein
TCSYLVIO_1332	Tc00.1047053508917.49	Tc00.1047053508919.10	peptidase T, putative
TCSYLVIO_1374	Tc00.1047053508851.210	Tc00.1047053511229.9	replication factor C, subunit 4, putative
TCSYLVIO_1386	Tc00.1047053511229.120	Tc00.1047053511231.14	hypothetical protein
TCSYLVIO_1477	Tc00.1047053509611.10	Tc00.1047053509609.19	PIF1 helicase-like protein, putative
TCSYLVIO_1491	Tc00.1047053507649.5	Tc00.1047053507647.39	hypothetical protein
TCSYLVIO_1516	Tc00.1047053503733.5	Tc00.1047053503731.9	hypothetical protein
TCSYLVIO_1521	Tc00.1047053509605.10	Tc00.1047053509603.19	malonyl-CoA decarboxylase, mitochondrial precursor, putative
TCSYLVIO_1522	Tc00.1047053419833.10	Tc00.1047053503727.29	vacuolar protein sorting protein 18, putative
TCSYLVIO_1575	Tc00.1047053508547.201	Tc00.1047053508971.50	ubiquitin-protein ligase-like, putative
TCSYLVIO_1620	Tc00.1047053509987.10	Tc00.1047053509985.78	hypothetical protein
TCSYLVIO_1658	Tc00.1047053506123.10	Tc00.1047053509541.19	major vault protein, putative
TCSYLVIO_1661	Tc00.1047053509541.4	Tc00.1047053509539.67	paraflagellar rod component Par4, putative
TCSYLVIO_1691	Tc00.1047053510965.29	Tc00.1047053506581.4	hypothetical protein, conserved
TCSYLVIO_1723	Tc00.1047053508657.20	Tc00.1047053503791.49	sec1-like protein, putative
TCSYLVIO_1731	Tc00.1047053508659.50	Tc00.1047053506583.4	serine/threonine protein kinase, putative
TCSYLVIO_1985	Tc00.1047053511649.169	Tc00.1047053511651.10	ATP-dependent DEAD/H RNA helicase, putative
TCSYLVIO_1986	Tc00.1047053511651.19	Tc00.1047053511653.10	delta-adaptin, putative
TCSYLVIO_2006	Tc00.1047053503563.29	Tc00.1047053507061.10	hypothetical protein
TCSYLVIO_2014	Tc00.1047053507061.49	Tc00.1047053503825.10	protein kinase, putative
TCSYLVIO_2024	Tc00.1047053511657.79	Tc00.1047053511659.9	hypothetical protein
TCSYLVIO_2079	Tc00.1047053506321.359	Tc00.1047053509721.10	hypothetical protein
TCSYLVIO_2117	Tc00.1047053441729.9	Tc00.1047053510993.19	hypothetical protein
TCSYLVIO_2146	Tc00.1047053509331.9	Tc00.1047053507221.80	5'-3' exonuclease XRNC, putative
TCSYLVIO_2183	Tc00.1047053509461.10	Tc00.1047053509459.79	actin interacting protein-like protein, putative
TCSYLVIO_2227	Tc00.1047053504003.14	Tc00.1047053507851.10	hypothetical protein
TCSYLVIO_2235	Tc00.1047053447483.4	Tc00.1047053507645.70	hypothetical protein
TCSYLVIO_2241	Tc00.1047053507645.11	Tc00.1047053506219.10	hypothetical protein
TCSYLVIO_2281	Tc00.1047053510975.40	Tc00.1047053506619.5	hypothetical protein
TCSYLVIO_2300	Tc00.1047053503413.19	Tc00.1047053503415.10	hypothetical protein
TCSYLVIO_2323	Tc00.1047053507715.100	Tc00.1047053507717.9	hypothetical protein
TCSYLVIO_2429	Tc00.1047053507801.19	Tc00.1047053506347.10	dynein heavy chain, putative
TCSYLVIO_2622	Tc00.1047053506575.9	Tc00.1047053508957.40	hypothetical protein
TCSYLVIO_2625	Tc00.1047053508957.14	Tc00.1047053503581.10	hypothetical protein
TCSYLVIO_2628	Tc00.1047053503581.39	Tc00.1047053506573.91	coatomer delta subunit, putative
TCSYLVIO_2649	Tc00.1047053470687.9	Tc00.1047053506415.30	hypothetical protein
TCSYLVIO_2707	Tc00.1047053503473.4	Tc00.1047053503851.54	proteasome 26S non-ATPase subunit 9, putative
TCSYLVIO_2790	Tc00.1047053511905.9	Tc00.1047053451263.9	hypothetical protein
TCSYLVIO_2846	Tc00.1047053510065.60	Tc00.1047053510067.9	hypothetical protein
TCSYLVIO_2896	Tc00.1047053508641.330	Tc00.1047053508643.9	pre-mRNA splicing factor, putative
TCSYLVIO_2899	Tc00.1047053508643.40	Tc00.1047053508645.4	hypothetical protein
TCSYLVIO_2965	Tc00.1047053509879.10	Tc00.1047053402647.9	hypothetical protein
TCSYLVIO_2965	Tc00.1047053402647.9	Tc00.1047053507857.80	hypothetical protein
TCSYLVIO_2975	Tc00.1047053479883.10	Tc00.1047053509877.89	hypothetical protein
TCSYLVIO_3041	Tc00.1047053506297.4	Tc00.1047053507765.149	hypothetical protein
TCSYLVIO_3093	Tc00.1047053508799.10	Tc00.1047053508797.29	hypothetical protein
TCSYLVIO_3095	Tc00.1047053508797.10	Tc00.1047053511169.29	tubulin-tyrosine ligase-like protein, putative
TCSYLVIO_3097	Tc00.1047053511169.10	Tc00.1047053511167.119	hypothetical protein
TCSYLVIO_3135	Tc00.1047053504113.10	Tc00.1047053508795.19	protein kinase, putative
TCSYLVIO_3136	Tc00.1047053508795.10	Tc00.1047053506905.59	SNF2 DNA repair protein, putative
TCSYLVIO_3151	Tc00.1047053511155.4	Tc00.1047053511153.150	hypothetical protein
TCSYLVIO_3237	Tc00.1047053476733.29	Tc00.1047053506681.70	threonine dehydratase-like, putative
TCSYLVIO_3258	Tc00.1047053420533.9	Tc00.1047053510303.320	dihydrofolate reductase-thymidylate synthase, putative
TCSYLVIO_3325	Tc00.1047053510397.5	Tc00.1047053510395.30	GTPase, putative
TCSYLVIO_3343	Tc00.1047053506793.10	Tc00.1047053506791.79	hypothetical protein
TCSYLVIO_3360	Tc00.1047053508263.5	Tc00.1047053506789.352	hypothetical protein, conserved
TCSYLVIO_3569	Tc00.1047053511257.10	Tc00.1047053503721.39	heat shock protein 70 (HSP70), putative
TCSYLVIO_3574	Tc00.1047053503721.10	Tc00.1047053508879.229	chaperone DnaJ protein
TCSYLVIO_3599	Tc00.1047053508879.4	Tc00.1047053503463.10	protein kinase C substrate protein, heavy chain, putative
TCSYLVIO_3606	Tc00.1047053503843.40	Tc00.1047053507513.10	hypothetical protein
TCSYLVIO_3653	Tc00.1047053509505.89	Tc00.1047053503919.4	hypothetical protein
TCSYLVIO_3687	Tc00.1047053509509.69	Tc00.1047053507519.10	hypothetical protein
TCSYLVIO_3755	Tc00.1047053510823.109	Tc00.1047053510825.10	hypothetical protein
TCSYLVIO_3767	Tc00.1047053506317.30	Tc00.1047053503459.29	Hypothetical protein
TCSYLVIO_3817	Tc00.1047053427303.10	Tc00.1047053505939.89	5'-3' exonuclease XNRA, putative
TCSYLVIO_3852	Tc00.1047053508821.10	Tc00.1047053508819.50	katanin, putative
TCSYLVIO_3875	Tc00.1047053508817.5	Tc00.1047053508815.179	dynein heavy chain, putative
TCSYLVIO_3974	Tc00.1047053510901.10	Tc00.1047053510899.59	hypothetical protein
TCSYLVIO_4004	Tc00.1047053510895.9	Tc00.1047053511015.10	hypothetical protein
TCSYLVIO_4027	Tc00.1047053508699.130	Tc00.1047053450161.10	cation transporter, putative
TCSYLVIO_4032	Tc00.1047053435519.19	Tc00.1047053506935.10	hypothetical protein
TCSYLVIO_4033	Tc00.1047053506935.19	Tc00.1047053503935.4	hypothetical protein
TCSYLVIO_4063	Tc00.1047053510439.10	Tc00.1047053510437.79	heat shock protein 70, putative
TCSYLVIO_4150	Tc00.1047053474937.9	Tc00.1047053507897.40	acetyl-CoA carboxylase, putative
TCSYLVIO_4293	Tc00.1047053510009.19	Tc00.1047053460747.30	hypothetical protein, conserved
TCSYLVIO_4364	Tc00.1047053509033.109	Tc00.1047053503815.4	hypothetical protein
TCSYLVIO_4367	Tc00.1047053503815.29	Tc00.1047053507017.4	hypothetical protein
TCSYLVIO_4409	Tc00.1047053509037.50	Tc00.1047053509039.4	aspartyl-tRNA synthetase, putative
TCSYLVIO_4413	Tc00.1047053509039.49	Tc00.1047053511495.11	hypothetical protein
TCSYLVIO_4444	Tc00.1047053509045.29	Tc00.1047053509047.10	hypothetical protein
TCSYLVIO_4460	Tc00.1047053509049.51	Tc00.1047053511497.10	hypothetical protein
TCSYLVIO_4466	Tc00.1047053509051.60	Tc00.1047053509053.10	ubiquitin-protein ligase, putative
TCSYLVIO_4483	Tc00.1047053509053.179	Tc00.1047053509055.10	RNA-binding protein, putative
TCSYLVIO_4491	Tc00.1047053509055.69	Tc00.1047053509057.10	hypothetical protein
TCSYLVIO_4502	Tc00.1047053511499.69	Tc00.1047053509059.10	hypothetical protein
TCSYLVIO_4513	Tc00.1047053509059.89	Tc00.1047053463359.9	vacuolar assembly protein vps41, putative
TCSYLVIO_4567	Tc00.1047053507023.289	Tc00.1047053511503.9	hypothetical protein
TCSYLVIO_4621	Tc00.1047053511513.30	Tc00.1047053507027.30	hypothetical protein
TCSYLVIO_4687	Tc00.1047053511523.100	Tc00.1047053509065.9	aldehyde dehydrogenase, putative
TCSYLVIO_4718	Tc00.1047053504257.70	Tc00.1047053510443.9	valyl-tRNA synthetase, putative
TCSYLVIO_4735	Tc00.1047053506831.79	Tc00.1047053432067.10	ATP-dependent RNA helicase, putative
TCSYLVIO_4736	Tc00.1047053432067.20	Tc00.1047053506833.9	hypothetical protein
TCSYLVIO_4760	Tc00.1047053506835.159	Tc00.1047053510445.10	casein kinase 1 isoform 2, putative
TCSYLVIO_4813	Tc00.1047053510153.5	Tc00.1047053431889.10	hypothetical protein
TCSYLVIO_4877	Tc00.1047053510795.30	Tc00.1047053508503.10	fatty acid desaturase, putative
TCSYLVIO_4911	Tc00.1047053507569.4	Tc00.1047053509535.9	electon transport protein SCO1/SCO2, putative
TCSYLVIO_4915	Tc00.1047053503943.10	Tc00.1047053505193.110	serine/threonine protein kinase, putative
TCSYLVIO_4956	Tc00.1047053510039.109	Tc00.1047053510041.10	sec1 family transport protein, putative
TCSYLVIO_4975	Tc00.1047053503925.3	Tc00.1047053506469.10	hypothetical protein
TCSYLVIO_4993	Tc00.1047053436083.9	Tc00.1047053506471.10	hypothetical protein
TCSYLVIO_5008	Tc00.1047053508111.40	Tc00.1047053507055.20	hypothetical protein
TCSYLVIO_5009	Tc00.1047053507055.10	Tc00.1047053510691.95	hypothetical protein
TCSYLVIO_5015	Tc00.1047053510691.4	Tc00.1047053510689.89	hypothetical protein
TCSYLVIO_5024	Tc00.1047053510689.10	Tc00.1047053510687.149	hypothetical protein
TCSYLVIO_5090	Tc00.1047053508257.10	Tc00.1047053503929.79	serine-palmitoyl-CoA transferase, putative
TCSYLVIO_5108	Tc00.1047053506705.10	Tc00.1047053508695.30	hypothetical protein
TCSYLVIO_5110	Tc00.1047053508695.10	Tc00.1047053508693.199	hypothetical protein
TCSYLVIO_5168	Tc00.1047053503923.50	Tc00.1047053508689.50	glycosylphosphatidylinositol (GPI) anchor, putative
TCSYLVIO_5241	Tc00.1047053506559.4	Tc00.1047053508051.40	hypothetical protein
TCSYLVIO_5261	Tc00.1047053508029.59	Tc00.1047053504199.30	kinesin, putative
TCSYLVIO_5285	Tc00.1047053504253.60	Tc00.1047053509933.10	hypothetical protein
TCSYLVIO_5335	Tc00.1047053426799.19	Tc00.1047053507159.10	serine/threonine protein kinase, putative
TCSYLVIO_5342	Tc00.1047053507159.90	Tc00.1047053506199.5	DNA-directed RNA polymerase subunit, putative
TCSYLVIO_5344	Tc00.1047053506199.30	Tc00.1047053506201.4	hypothetical protein
TCSYLVIO_5382	Tc00.1047053508523.80	Tc00.1047053508525.5	cyclic nucleotide-binding protein, putative
TCSYLVIO_5439	Tc00.1047053506725.10	Tc00.1047053511027.29	hypothetical protein
TCSYLVIO_5441	Tc00.1047053511027.10	Tc00.1047053503839.5	chloride channel protein, putative
TCSYLVIO_5548	Tc00.1047053426897.4	Tc00.1047053506819.10	hypothetical protein
TCSYLVIO_5623	Tc00.1047053506425.169	Tc00.1047053503987.4	ras-related protein rab-2a, putative
TCSYLVIO_5659	Tc00.1047053508445.99	Tc00.1047053401469.20	pumilio/PUF RNA binding protein 7, putative
TCSYLVIO_5664	Tc00.1047053504207.29	Tc00.1047053510727.9	hypothetical protein
TCSYLVIO_5669	Tc00.1047053504217.4	Tc00.1047053427789.10	hypothetical protein
TCSYLVIO_5672	Tc00.1047053427789.39	Tc00.1047053511717.10	hypothetical protein
TCSYLVIO_5694	Tc00.1047053511717.209	Tc00.1047053511719.10	phosphatidylinositol 3-related kinase, putative
TCSYLVIO_5700	Tc00.1047053506873.4	Tc00.1047053509159.10	RNA helicase, putative
TCSYLVIO_5826	Tc00.1047053510647.69	Tc00.1047053508407.4	hypothetical protein
TCSYLVIO_5830	Tc00.1047053504221.20	Tc00.1047053508409.9	26S proteasome regulatory non-ATPase subunit, putative
TCSYLVIO_5861	Tc00.1047053508409.338	Tc00.1047053490165.9	DNA repair protein, putative
TCSYLVIO_5923	Tc00.1047053507951.299	Tc00.1047053506485.10	hypothetical protein
TCSYLVIO_5932	Tc00.1047053506485.109	Tc00.1047053442495.10	hypothetical protein
TCSYLVIO_5933	Tc00.1047053442495.19	Tc00.1047053504121.10	KU70 protein, putative
TCSYLVIO_5945	Tc00.1047053509997.86	Tc00.1047053442287.10	serine/threonine protein phosphatase, putative
TCSYLVIO_5988	Tc00.1047053506175.5	Tc00.1047053509621.10	hypothetical protein
TCSYLVIO_5988	Tc00.1047053509621.10	Tc00.1047053509619.20	hypothetical protein
TCSYLVIO_5989	Tc00.1047053509619.10	Tc00.1047053509617.89	Zn-finger protein, putative
TCSYLVIO_6188	Tc00.1047053510267.20	Tc00.1047053503505.10	60S acidic ribosomal protein P2, putative
TCSYLVIO_6191	Tc00.1047053503505.20	Tc00.1047053506669.4	MFS transporter, putative
TCSYLVIO_6230	Tc00.1047053509627.10	Tc00.1047053504105.260	hypothetical protein
TCSYLVIO_6259	Tc00.1047053504105.10	Tc00.1047053506195.309	hypothetical protein
TCSYLVIO_6311	Tc00.1047053507723.189	Tc00.1047053506247.10	protein disulfide isomerase, putative
TCSYLVIO_6362	Tc00.1047053398235.10	Tc00.1047053508235.40	protein kinase, putative
TCSYLVIO_6369	Tc00.1047053508233.4	Tc00.1047053508231.230	protein transport protein Sec23A, putative
TCSYLVIO_6420	Tc00.1047053509789.59	Tc00.1047053509791.10	hypothetical protein
TCSYLVIO_6445	Tc00.1047053509793.69	Tc00.1047053509795.10	hypothetical protein
TCSYLVIO_6462	Tc00.1047053507825.49	Tc00.1047053509797.9	hypothetical protein
TCSYLVIO_6491	Tc00.1047053506841.4	Tc00.1047053504079.20	hypothetical protein
TCSYLVIO_6494	Tc00.1047053504079.3	Tc00.1047053506839.89	ATP-dependent chaperone, putative
TCSYLVIO_6582	Tc00.1047053509643.10	Tc00.1047053469735.9	hypothetical protein
TCSYLVIO_6599	Tc00.1047053509639.10	Tc00.1047053509637.36	procyclic form surface glycoprotein, putative
TCSYLVIO_6642	Tc00.1047053504021.149	Tc00.1047053509647.190	hypothetical protein
TCSYLVIO_6699	Tc00.1047053506327.10	Tc00.1047053507785.20	proteasome alpha 1 subunit, putative
TCSYLVIO_6791	Tc00.1047053503431.109	Tc00.1047053507609.10	nucleoporin interacting component (NUP93), putative
TCSYLVIO_6861	Tc00.1047053509017.9	Tc00.1047053511465.30	hypothetical protein
TCSYLVIO_6867	Tc00.1047053511463.4	Tc00.1047053503679.40	actin, putative
TCSYLVIO_6878	Tc00.1047053511461.4	Tc00.1047053511459.70	hypothetical protein
TCSYLVIO_6903	Tc00.1047053507539.49	Tc00.1047053507541.10	hypothetical protein
TCSYLVIO_7135	Tc00.1047053503465.49	Tc00.1047053508301.20	mitochondrial processing peptidase, beta subunit, putative
TCSYLVIO_7245	Tc00.1047053508507.9	Tc00.1047053508505.40	hypothetical protein
TCSYLVIO_7249	Tc00.1047053508505.4	Tc00.1047053510797.39	hypothetical protein
TCSYLVIO_7253	Tc00.1047053510797.4	Tc00.1047053506719.10	phosphatidylinositol (3,5) kinase, putative
TCSYLVIO_7279	Tc00.1047053506629.10	Tc00.1047053444777.29	intraflagellar transport protein IFT88, putative
TCSYLVIO_7281	Tc00.1047053444777.10	Tc00.1047053510225.59	transporter, putative
TCSYLVIO_7289	Tc00.1047053510223.5	Tc00.1047053427743.9	translation initiation factor eIF2B subunit-like protein, putative
TCSYLVIO_7365	Tc00.1047053506303.171	Tc00.1047053506305.5	hypothetical protein
TCSYLVIO_7369	Tc00.1047053506305.40	Tc00.1047053507771.9	kinesin, putative
TCSYLVIO_7393	Tc00.1047053460127.30	Tc00.1047053452283.10	amino acid permease, putative
TCSYLVIO_7394	Tc00.1047053452283.4	Tc00.1047053406377.10	hypothetical protein
TCSYLVIO_7407	Tc00.1047053506883.130	Tc00.1047053504123.50	Hypothetical protein
TCSYLVIO_7446	Tc00.1047053510729.10	Tc00.1047053503687.58	AMP deaminase, putative
TCSYLVIO_7471	Tc00.1047053510731.130	Tc00.1047053508459.9	putative SMC-domain containing protein
TCSYLVIO_7472	Tc00.1047053508459.18	Tc00.1047053407335.9	phosphatidylserine decarboxylase, putative
TCSYLVIO_7473	Tc00.1047053407335.18	Tc00.1047053507007.9	hypothetical protein
TCSYLVIO_7487	Tc00.1047053507007.108	Tc00.1047053510733.5	amino acid permease, putative
TCSYLVIO_7503	Tc00.1047053510735.100	Tc00.1047053508461.4	hypothetical protein
TCSYLVIO_7590	Tc00.1047053510667.4	Tc00.1047053507005.80	putative SMC-domain containing protein
TCSYLVIO_7609	Tc00.1047053503983.29	Tc00.1047053507003.70	hypothetical protein
TCSYLVIO_7680	Tc00.1047053510659.4	Tc00.1047053507001.140	hypothetical protein
TCSYLVIO_7696	Tc00.1047053507001.4	Tc00.1047053504185.40	hypothetical protein
TCSYLVIO_7718	Tc00.1047053510657.10	Tc00.1047053510655.159	hypothetical protein
TCSYLVIO_7733	Tc00.1047053510655.10	Tc00.1047053510653.19	hypothetical protein
TCSYLVIO_7734	Tc00.1047053510653.10	Tc00.1047053508415.59	hypothetical protein
TCSYLVIO_7862	Tc00.1047053509715.150	Tc00.1047053509717.9	hypothetical protein
TCSYLVIO_7906	Tc00.1047053511301.10	Tc00.1047053511299.79	oxidoreductase-protein, putative
TCSYLVIO_7910	Tc00.1047053511299.10	Tc00.1047053503809.158	class 3 lipase, putative
TCSYLVIO_7955	Tc00.1047053511297.10	Tc00.1047053511295.70	hypothetical protein
TCSYLVIO_7992	Tc00.1047053511293.10	Tc00.1047053507033.29	extracellular receptor, putative
TCSYLVIO_8015	Tc00.1047053507031.10	Tc00.1047053511291.129	hypothetical protein
TCSYLVIO_8027	Tc00.1047053511291.10	Tc00.1047053508895.89	hypothetical protein
TCSYLVIO_8036	Tc00.1047053508895.10	Tc00.1047053511289.119	C-terminal motor kinesin, putative
TCSYLVIO_8048	Tc00.1047053420719.9	Tc00.1047053511287.180	protein kinase, putative
TCSYLVIO_8083	Tc00.1047053511285.4	Tc00.1047053511283.320	hypothetical protein
TCSYLVIO_8132	Tc00.1047053511281.10	Tc00.1047053508893.40	hypothetical protein
TCSYLVIO_8210	Tc00.1047053511277.4	Tc00.1047053503681.29	hypothetical protein
TCSYLVIO_8212	Tc00.1047053503681.9	Tc00.1047053508891.130	hypothetical protein
TCSYLVIO_8224	Tc00.1047053508891.4	Tc00.1047053511275.40	hypothetical protein
TCSYLVIO_8228	Tc00.1047053511275.10	Tc00.1047053482319.10	hypothetical protein
TCSYLVIO_8240	Tc00.1047053508889.4	Tc00.1047053511273.59	5-oxoprolinase, putative
TCSYLVIO_8270	Tc00.1047053503939.4	Tc00.1047053511267.40	hypothetical protein
TCSYLVIO_8296	Tc00.1047053506333.19	Tc00.1047053509741.10	kinesin, putative
TCSYLVIO_8301	Tc00.1047053509741.50	Tc00.1047053507787.10	kinesin, putative
TCSYLVIO_8468	Tc00.1047053511479.48	Tc00.1047053511481.10	hypothetical protein
TCSYLVIO_8501	Tc00.1047053509025.29	Tc00.1047053509027.10	DNA photolyase, putative
TCSYLVIO_8573	Tc00.1047053506621.70	Tc00.1047053503691.9	hypothetical protein
TCSYLVIO_8932	Tc00.1047053510359.10	Tc00.1047053510357.160	hypothetical protein, conserved
TCSYLVIO_9004	Tc00.1047053510119.70	Tc00.1047053416891.9	protein kinase, putative
TCSYLVIO_9005	Tc00.1047053416891.19	Tc00.1047053510121.9	hypothetical protein
TCSYLVIO_9086	Tc00.1047053510887.70	Tc00.1047053510889.4	hypothetical protein
TCSYLVIO_9138	Tc00.1047053507297.10	Tc00.1047053509429.329	cysteine peptidase, putative
TCSYLVIO_9192	Tc00.1047053507913.39	Tc00.1047053507915.5	glutaminyl-tRNA synthetase, putative
TCSYLVIO_9194	Tc00.1047053507915.19	Tc00.1047053416511.9	mismatch repair protein MSH3, putative
TCSYLVIO_9262	Tc00.1047053437999.9	Tc00.1047053506511.10	hypothetical protein
TCSYLVIO_9302	Tc00.1047053510335.30	Tc00.1047053510337.11	hypothetical protein
TCSYLVIO_9316	Tc00.1047053508199.90	Tc00.1047053510339.7	tetratricopeptide repeat domain protein
TCSYLVIO_9347	Tc00.1047053510577.10	Tc00.1047053510575.239	hypothetical protein
TCSYLVIO_9383	Tc00.1047053452039.9	Tc00.1047053510573.19	hypothetical protein
TCSYLVIO_9396	Tc00.1047053505997.210	Tc00.1047053509487.4	DNA-directed RNA polymerase III subunit, putative
TCSYLVIO_9443	Tc00.1047053507949.4	Tc00.1047053506479.130	cytidine triphosphate synthase, putative
TCSYLVIO_9466	Tc00.1047053506477.4	Tc00.1047053474339.9	hypothetical protein
TCSYLVIO_9466	Tc00.1047053474887.9	Tc00.1047053507945.30	hypothetical protein
TCSYLVIO_9493	Tc00.1047053506475.14	Tc00.1047053509989.10	phosphatidylinositol 3-kinase, putative
TCSYLVIO_9511	Tc00.1047053508999.269	Tc00.1047053509001.10	hypothetical protein
TCSYLVIO_9521	Tc00.1047053509003.79	Tc00.1047053503869.60	coatomer beta subunit, putative
TCSYLVIO_9526	Tc00.1047053503869.9	Tc00.1047053509005.10	axoneme central apparatus protein, putative

## Sheet: Esmeraldo
Sylvio	Esmeraldo fragment 1	Esmeraldo fragment 2	Annotation
TCSYLVIO_4	Tc00.1047053506533.34	Tc00.1047053410961.10	phosphatidylinositol kinase domain protein, putative
TCSYLVIO_10	Tc00.1047053448387.9	Tc00.1047053503653.104	hypothetical protein
TCSYLVIO_48	Tc00.1047053509247.60	Tc00.1047053504133.45	hypothetical protein
TCSYLVIO_54	Tc00.1047053507933.29	Tc00.1047053506457.4	hypothetical protein
TCSYLVIO_88	Tc00.1047053509967.189	Tc00.1047053426397.9	kinesin, putative
TCSYLVIO_125	Tc00.1047053503479.10	Tc00.1047053508779.9	hypothetical protein
TCSYLVIO_132	Tc00.1047053508779.90	Tc00.1047053508781.10	structural maintenance of chromosome protein 4, putative
TCSYLVIO_144	Tc00.1047053417797.9	Tc00.1047053511135.10	hypothetical protein
TCSYLVIO_150	Tc00.1047053511137.20	Tc00.1047053508783.10	hypothetical protein
TCSYLVIO_150	Tc00.1047053508783.10	Tc00.1047053511139.10	hypothetical protein
TCSYLVIO_153	Tc00.1047053511139.40	Tc00.1047053482471.19	RNA helicase, putative
TCSYLVIO_154	Tc00.1047053482471.10	Tc00.1047053508785.4	hypothetical protein
TCSYLVIO_158	Tc00.1047053511141.30	Tc00.1047053511143.6	protein kinase, putative
TCSYLVIO_162	Tc00.1047053511143.39	Tc00.1047053506869.4	hypothetical protein
TCSYLVIO_209	Tc00.1047053504213.10	Tc00.1047053508089.71	hypothetical protein
TCSYLVIO_276	Tc00.1047053510989.69	Tc00.1047053427247.4	hypothetical protein
TCSYLVIO_284	Tc00.1047053420989.10	Tc00.1047053506659.39	protein phosphatase 2C, putative
TCSYLVIO_336	Tc00.1047053405165.19	Tc00.1047053510405.9	hypothetical protein
TCSYLVIO_336	Tc00.1047053510405.9	Tc00.1047053508265.110	hypothetical protein
TCSYLVIO_346	Tc00.1047053508265.4	Tc00.1047053510403.89	synaptojanin (N-terminal domain), putative
TCSYLVIO_357	Tc00.1047053506685.50	Tc00.1047053503905.10	myosin heavy chain, putative
TCSYLVIO_362	Tc00.1047053503595.19	Tc00.1047053511571.10	ATP-dependent DEAD/H RNA helicase, putative
TCSYLVIO_384	Tc00.1047053505945.5	Tc00.1047053509475.10	mitogen-activated protein kinase 3, putative
TCSYLVIO_385	Tc00.1047053509473.10	Tc00.1047053445553.10	hypothetical protein
TCSYLVIO_396	Tc00.1047053505943.10	Tc00.1047053505941.49	hypothetical protein
TCSYLVIO_424	Tc00.1047053503895.10	Tc00.1047053508987.9	hypothetical protein
TCSYLVIO_436	Tc00.1047053511407.80	Tc00.1047053506865.79	hypothetical protein
TCSYLVIO_447	Tc00.1047053506865.2	Tc00.1047053508989.9	nucleoside phosphorylase, putative
TCSYLVIO_597	Tc00.1047053510527.9	Tc00.1047053413605.10	kinesin, putative
TCSYLVIO_602	Tc00.1047053510529.39	Tc00.1047053432027.9	hypothetical protein
TCSYLVIO_618	Tc00.1047053510531.109	Tc00.1047053510533.10	dynein heavy chain, cytosolic, putative
TCSYLVIO_654	Tc00.1047053508323.199	Tc00.1047053506861.10	ATP-dependent DEAD/H RNA helicase, putative
TCSYLVIO_692	Tc00.1047053506239.60	Tc00.1047053506181.150	hypothetical protein
TCSYLVIO_711	Tc00.1047053509625.10	Tc00.1047053506179.59	RNA helicase, putative
TCSYLVIO_789	Tc00.1047053503821.5	Tc00.1047053508731.9	hypothetical protein
TCSYLVIO_823	Tc00.1047053509585.10	Tc00.1047053509583.19	dynein heavy chain, putative
TCSYLVIO_839	Tc00.1047053506713.10	Tc00.1047053509231.5	hypothetical protein
TCSYLVIO_853	Tc00.1047053511867.209	Tc00.1047053511869.9	dynein heavy chain, putative
TCSYLVIO_853	Tc00.1047053479379.9	Tc00.1047053474341.9	dynein heavy chain, putative
TCSYLVIO_908	Tc00.1047053503813.30	Tc00.1047053509453.4	hypothetical protein
TCSYLVIO_917	Tc00.1047053509453.90	Tc00.1047053509455.9	hypothetical protein
TCSYLVIO_1067	Tc00.1047053510285.140	Tc00.1047053506673.10	hypothetical protein
TCSYLVIO_1094	Tc00.1047053503757.49	Tc00.1047053509827.20	hypothetical protein
TCSYLVIO_1105	Tc00.1047053509823.4	Tc00.1047053503971.5	hypothetical protein
TCSYLVIO_1113	Tc00.1047053503971.59	Tc00.1047053507841.40	hypothetical protein
TCSYLVIO_1122	Tc00.1047053507839.9	Tc00.1047053509819.49	zinc-binding phosphatase, putative
TCSYLVIO_1135	Tc00.1047053507837.10	Tc00.1047053506363.159	separase, putative
TCSYLVIO_1231	Tc00.1047053511305.40	Tc00.1047053511307.3	hypothetical protein
TCSYLVIO_1251	Tc00.1047053511313.40	Tc00.1047053511315.9	ATP-dependent RNA helicase, putative
TCSYLVIO_1283	Tc00.1047053510057.4	Tc00.1047053503967.4	hypothetical protein
TCSYLVIO_1285	Tc00.1047053503967.19	Tc00.1047053503751.10	hypothetical protein
TCSYLVIO_1286	Tc00.1047053503751.30	Tc00.1047053506517.158	hypothetical protein
TCSYLVIO_1298	Tc00.1047053506517.14	Tc00.1047053510055.160	protein kinase, putative
TCSYLVIO_1312	Tc00.1047053506515.10	Tc00.1047053510053.79	FG-GAP repeat protein, putative
TCSYLVIO_1345	Tc00.1047053507977.9	Tc00.1047053507975.80	hypothetical protein
TCSYLVIO_1456	Tc00.1047053425311.9	Tc00.1047053510855.4	hypothetical protein, conserved
TCSYLVIO_1516	Tc00.1047053508571.10	Tc00.1047053510863.9	hypothetical protein
TCSYLVIO_1591	Tc00.1047053511395.10	Tc00.1047053511393.88	hypothetical protein
TCSYLVIO_1650	Tc00.1047053510351.150	Tc00.1047053449247.4	phosphoprotein phosphatase, putative
TCSYLVIO_1652	Tc00.1047053449247.20	Tc00.1047053508205.4	hypothetical protein
TCSYLVIO_1665	Tc00.1047053419417.19	Tc00.1047053506717.4	hypothetical protein
TCSYLVIO_1672	Tc00.1047053506341.10	Tc00.1047053397937.5	N-acetylglucosamine-6-phosphate deacetylase-like protein, putative
TCSYLVIO_1673	Tc00.1047053397937.10	Tc00.1047053509759.19	pumilio/PUF RNA binding protein 1, putative
TCSYLVIO_1674	Tc00.1047053509759.10	Tc00.1047053509757.49	L-ribulokinase, putative
TCSYLVIO_1678	Tc00.1047053509757.10	Tc00.1047053510963.5	hypothetical protein
TCSYLVIO_1688	Tc00.1047053510963.90	Tc00.1047053508169.9	elongation factor 2, putative
TCSYLVIO_1700	Tc00.1047053508169.129	Tc00.1047053510287.4	NUDIX hydrolase, putative
TCSYLVIO_1721	Tc00.1047053510289.99	Tc00.1047053504203.4	hypothetical protein
TCSYLVIO_1737	Tc00.1047053506677.39	Tc00.1047053510293.10	mitochondrial elongation factor G, putative
TCSYLVIO_1753	Tc00.1047053510295.59	Tc00.1047053510297.10	hypothetical protein
TCSYLVIO_1766	Tc00.1047053510297.119	Tc00.1047053503795.10	hypothetical protein
TCSYLVIO_1788	Tc00.1047053445011.19	Tc00.1047053504097.40	hypothetical protein
TCSYLVIO_1792	Tc00.1047053504097.4	Tc00.1047053503611.10	hypothetical protein
TCSYLVIO_1869	Tc00.1047053510253.29	Tc00.1047053510255.4	hypothetical protein
TCSYLVIO_1872	Tc00.1047053510255.29	Tc00.1047053510257.10	hypothetical protein
TCSYLVIO_2698	Tc00.1047053508379.10	Tc00.1047053508377.9	fucose kinase, putative
TCSYLVIO_1966	Tc00.1047053503619.39	Tc00.1047053414517.9	hypothetical protein
TCSYLVIO_1966	Tc00.1047053414517.9	Tc00.1047053503529.10	hypothetical protein
TCSYLVIO_2007	Tc00.1047053509777.4	Tc00.1047053509775.49	ribosomal protein L2, putative
TCSYLVIO_2050	Tc00.1047053503955.10	Tc00.1047053503953.59	mitochondrial DNA polymerase beta-PAK, putative
TCSYLVIO_2061	Tc00.1047053507807.10	Tc00.1047053507805.30	hypothetical protein
TCSYLVIO_2063	Tc00.1047053507805.9	Tc00.1047053507803.49	histone deacetylase, putative
TCSYLVIO_2074	Tc00.1047053506607.19	Tc00.1047053503777.19	phosphoribosylpyrophosphate synthetase, putative
TCSYLVIO_2076	Tc00.1047053503777.4	Tc00.1047053510173.10	hypothetical protein
TCSYLVIO_2104	Tc00.1047053509497.9	Tc00.1047053503589.19	hypothetical protein
TCSYLVIO_2174	Tc00.1047053510507.60	Tc00.1047053510509.9	hypothetical protein
TCSYLVIO_2189	Tc00.1047053420495.19	Tc00.1047053506847.4	hypothetical protein
TCSYLVIO_2223	Tc00.1047053510515.139	Tc00.1047053510517.10	chaperonin/T-complex protein 1 gamma subunit, putative
TCSYLVIO_9808	Tc00.1047053506849.20	Tc00.1047053448567.9	dynein heavy chain, putative
TCSYLVIO_2281	Tc00.1047053511189.100	Tc00.1047053504117.9	hypothetical protein
TCSYLVIO_2320	Tc00.1047053511115.10	Tc00.1047053511113.9	hypothetical protein
TCSYLVIO_2327	Tc00.1047053413977.10	Tc00.1047053508769.10	hypothetical protein
TCSYLVIO_2371	Tc00.1047053511619.10	Tc00.1047053506979.59	hypothetical protein
TCSYLVIO_2405	Tc00.1047053503561.20	Tc00.1047053511625.4	hypothetical protein
TCSYLVIO_2491	Tc00.1047053509123.30	Tc00.1047053399033.19	hypothetical protein
TCSYLVIO_2497	Tc00.1047053509125.20	Tc00.1047053509127.10	ATP-dependent Clp protease subunit, heat shock protein 78, putative
TCSYLVIO_2510	Tc00.1047053425851.9	Tc00.1047053475705.9	hypothetical protein
TCSYLVIO_2510	Tc00.1047053475705.9	Tc00.1047053503629.10	hypothetical protein
TCSYLVIO_2514	Tc00.1047053503627.9	Tc00.1047053408437.10	hypothetical protein
TCSYLVIO_2548	Tc00.1047053509145.19	Tc00.1047053450061.10	hypothetical protein
TCSYLVIO_2567	Tc00.1047053506411.39	Tc00.1047053506413.10	CDP-diacylglycerol synthetase, putative
TCSYLVIO_2606	Tc00.1047053508839.89	Tc00.1047053443683.9	DNA-directed RNA polymerase I largest subunit, putative
TCSYLVIO_2772	Tc00.1047053511069.4	Tc00.1047053511067.30	transketolase, putative
TCSYLVIO_2776	Tc00.1047053511067.4	Tc00.1047053511065.50	phosphatidylinositol 3-kinase, putative
TCSYLVIO_2780	Tc00.1047053450155.9	Tc00.1047053503885.10	hypothetical protein
TCSYLVIO_2848	Tc00.1047053506207.10	Tc00.1047053506205.49	hypothetical protein
TCSYLVIO_2890	Tc00.1047053503487.10	Tc00.1047053506203.129	mitochondrial DNA-directed RNA polymerase, putative
TCSYLVIO_2934	Tc00.1047053504125.10	Tc00.1047053503981.90	DNA helicase, putative
TCSYLVIO_3008	Tc00.1047053508041.80	Tc00.1047053510101.10	protein transport protein sec31, putative
TCSYLVIO_3135	Tc00.1047053506777.120	Tc00.1047053508237.9	protein kinase, putative
TCSYLVIO_3136	Tc00.1047053508237.18	Tc00.1047053510381.5	SNF2 DNA repair protein, putative
TCSYLVIO_3149	Tc00.1047053508239.49	Tc00.1047053506779.10	hypothetical protein
TCSYLVIO_3169	Tc00.1047053506779.200	Tc00.1047053508241.10	glycerol-3-phosphate dehydrogenase, putative
TCSYLVIO_3346	Tc00.1047053510611.79	Tc00.1047053508383.10	hypothetical protein
TCSYLVIO_3357	Tc00.1047053478671.9	Tc00.1047053510613.10	hypothetical protein
TCSYLVIO_3364	Tc00.1047053510617.19	Tc00.1047053508387.10	hypothetical protein
TCSYLVIO_3553	Tc00.1047053506287.209	Tc00.1047053506289.9	DNA ligase, putative
TCSYLVIO_3569	Tc00.1047053509543.50	Tc00.1047053506135.9	heat shock protein 70 (HSP70), putative
TCSYLVIO_3601	Tc00.1047053508215.3	Tc00.1047053477079.10	protein kinase, putative
TCSYLVIO_3611	Tc00.1047053506729.9	Tc00.1047053503899.10	heat shock 70 kDa protein, putative
TCSYLVIO_3659	Tc00.1047053508209.10	Tc00.1047053503579.10	hypothetical protein
TCSYLVIO_3676	Tc00.1047053503901.18	Tc00.1047053508207.279	hypothetical protein
TCSYLVIO_3817	Tc00.1047053507817.80	Tc00.1047053506351.9	5'-3' exonuclease XNRA, putative
TCSYLVIO_3867	Tc00.1047053506165.16	Tc00.1047053503799.4	protein kinase, putative
TCSYLVIO_3868	Tc00.1047053503799.10	Tc00.1047053503801.9	DNA repair protein RAD50, putative
TCSYLVIO_3875	Tc00.1047053433273.10	Tc00.1047053462617.10	dynein heavy chain, putative
TCSYLVIO_3894	Tc00.1047053504041.4	Tc00.1047053504075.10	hypothetical protein
TCSYLVIO_3902	Tc00.1047053503753.29	Tc00.1047053506931.80	P450 reductase, putative
TCSYLVIO_3928	Tc00.1047053511199.9	Tc00.1047053506929.60	ATP-dependent DEAD/H RNA helicase, putative
TCSYLVIO_3974	Tc00.1047053511799.9	Tc00.1047053507077.9	hypothetical protein
TCSYLVIO_3982	Tc00.1047053509199.40	Tc00.1047053511801.4	hypothetical protein
TCSYLVIO_4004	Tc00.1047053511803.80	Tc00.1047053509201.10	hypothetical protein
TCSYLVIO_4007	Tc00.1047053511805.29	Tc00.1047053509203.10	2,3-bisphosphoglycerate-independent phosphoglycerate mutase, putative
TCSYLVIO_4026	Tc00.1047053509205.120	Tc00.1047053509197.50	hypothetical protein, conserved
TCSYLVIO_4034	Tc00.1047053507527.4	Tc00.1047053506025.70	hypothetical protein
TCSYLVIO_4069	Tc00.1047053506937.40	Tc00.1047053508829.9	dynein heavy chain, putative
TCSYLVIO_4069	Tc00.1047053508829.9	Tc00.1047053508831.4	dynein heavy chain, putative
TCSYLVIO_4150	Tc00.1047053510599.14	Tc00.1047053508369.50	acetyl-CoA carboxylase, putative
TCSYLVIO_4275	Tc00.1047053510773.9	Tc00.1047053510771.9	hypothetical protein, conserved
TCSYLVIO_4287	Tc00.1047053505009.4	Tc00.1047053505007.39	hypothetical protein, conserved
TCSYLVIO_10611	Tc00.1047053509953.9	Tc00.1047053509955.10	ubiquitin hydrolase, putative
TCSYLVIO_4408	Tc00.1047053504935.10	Tc00.1047053510777.29	eukaryotic translation initiation factor 4E, putative
TCSYLVIO_4444	Tc00.1047053507929.10	Tc00.1047053507927.100	hypothetical protein
TCSYLVIO_4454	Tc00.1047053507927.4	Tc00.1047053503835.5	rac serine-threonine kinase, putative
TCSYLVIO_4503	Tc00.1047053509965.10	Tc00.1047053507925.69	hypothetical protein
TCSYLVIO_4512	Tc00.1047053507925.10	Tc00.1047053507923.40	hypothetical protein
TCSYLVIO_4531	Tc00.1047053511753.9	Tc00.1047053511751.260	hypothetical protein
TCSYLVIO_4560	Tc00.1047053509173.9	Tc00.1047053509171.100	hypothetical protein
TCSYLVIO_4575	Tc00.1047053511747.7	Tc00.1047053503909.120	cyclosome subunit, putative
TCSYLVIO_4594	Tc00.1047053509169.10	Tc00.1047053469785.5	hypothetical protein
TCSYLVIO_4675	Tc00.1047053511735.10	Tc00.1047053511733.130	chaperonin HSP60/CNP60, putative
TCSYLVIO_4687	Tc00.1047053511733.10	Tc00.1047053506943.4	aldehyde dehydrogenase, putative
TCSYLVIO_4742	Tc00.1047053511731.5	Tc00.1047053511729.70	cationic amino acid transporter, putative
TCSYLVIO_4750	Tc00.1047053511729.9	Tc00.1047053506945.10	calmodulin, putative
TCSYLVIO_4815	Tc00.1047053511581.10	Tc00.1047053511579.9	fatty acyl CoA synthetase 2, putative
TCSYLVIO_4891	Tc00.1047053510565.179	Tc00.1047053508347.10	hypothetical protein
TCSYLVIO_4925	Tc00.1047053458153.10	Tc00.1047053506465.50	serine/threonine protein phosphatase-like protein, putative
TCSYLVIO_4943	Tc00.1047053503881.4	Tc00.1047053509979.379	hypothetical protein
TCSYLVIO_4977	Tc00.1047053510345.9	Tc00.1047053510343.15	protein kinase, putative
TCSYLVIO_4985	Tc00.1047053510341.4	Tc00.1047053506715.59	hypothetical protein
TCSYLVIO_10188	Tc00.1047053506715.10	Tc00.1047053504769.5	protein kinase, putative
TCSYLVIO_5109	Tc00.1047053505987.70	Tc00.1047053503865.80	phosphatidylinositol 4-kinase, putative
TCSYLVIO_5163	Tc00.1047053510879.10	Tc00.1047053508585.29	serine/threonine-protein phosphatase 2A, catalytic subunit, putative
TCSYLVIO_5232	Tc00.1047053510231.29	Tc00.1047053447255.29	multidrug resistance-associated protein, putative
TCSYLVIO_5241	Tc00.1047053508133.19	Tc00.1047053508135.10	hypothetical protein
TCSYLVIO_5248	Tc00.1047053506633.109	Tc00.1047053506635.10	hypothetical protein
TCSYLVIO_5263	Tc00.1047053410243.10	Tc00.1047053506637.10	hypothetical protein
TCSYLVIO_5286	Tc00.1047053507737.40	Tc00.1047053456139.10	hypothetical protein
TCSYLVIO_5311	Tc00.1047053506265.209	Tc00.1047053504055.10	SBDS-like protein
TCSYLVIO_5348	Tc00.1047053507673.10	Tc00.1047053507671.39	serine/threonine-protein phosphatase PP1 beta
TCSYLVIO_5359	Tc00.1047053509633.10	Tc00.1047053504129.50	hypothetical protein
TCSYLVIO_5384	Tc00.1047053507035.130	Tc00.1047053511525.11	hypothetical protein
TCSYLVIO_5392	Tc00.1047053504019.9	Tc00.1047053511529.9	hypothetical protein
TCSYLVIO_5448	Tc00.1047053507089.280	Tc00.1047053511531.9	chaperone DnaJ protein, putative
TCSYLVIO_5455	Tc00.1047053511531.59	Tc00.1047053511533.5	mitogen-activated protein kinase, putative
TCSYLVIO_5458	Tc00.1047053511533.19	Tc00.1047053503927.9	dynein light intermediate chain, putative
TCSYLVIO_5462	Tc00.1047053511535.39	Tc00.1047053509067.14	hypothetical protein
TCSYLVIO_5467	Tc00.1047053509067.70	Tc00.1047053503749.5	pyrroline-5-carboxylate synthetase-like protein, putative
TCSYLVIO_5472	Tc00.1047053503749.60	Tc00.1047053511537.8	ABC transporter, putative
TCSYLVIO_5484	Tc00.1047053511537.69	Tc00.1047053511539.9	hypothetical protein
TCSYLVIO_5485	Tc00.1047053511539.18	Tc00.1047053511541.9	hypothetical protein
TCSYLVIO_5497	Tc00.1047053509071.10	Tc00.1047053509073.10	hypothetical protein
TCSYLVIO_5508	Tc00.1047053509073.119	Tc00.1047053507037.10	proteasome regulatory non-ATPase subunit 7, putative
TCSYLVIO_5517	Tc00.1047053507037.89	Tc00.1047053511543.10	hypothetical protein
TCSYLVIO_5559	Tc00.1047053511545.199	Tc00.1047053410589.10	AMP deaminase, putative
TCSYLVIO_5604	Tc00.1047053511705.20	Tc00.1047053511707.10	serine carboxypeptidase S28, putative
TCSYLVIO_5676	Tc00.1047053506221.129	Tc00.1047053445849.10	hypothetical protein
TCSYLVIO_5681	Tc00.1047053503677.4	Tc00.1047053506223.10	hypothetical protein
TCSYLVIO_5709	Tc00.1047053507511.10	Tc00.1047053507509.89	cleavage and polyadenylation specificity factor, putative
TCSYLVIO_5721	Tc00.1047053507507.10	Tc00.1047053509491.20	hypothetical protein
TCSYLVIO_5859	Tc00.1047053510143.129	Tc00.1047053508075.7	hypothetical protein
TCSYLVIO_5870	Tc00.1047053510147.9	Tc00.1047053510149.9	hypothetical protein
TCSYLVIO_5894	Tc00.1047053503811.10	Tc00.1047053506591.4	lipophosphoglycan biosynthetic protein, putative
TCSYLVIO_5971	Tc00.1047053507531.19	Tc00.1047053507533.10	phosphatidylinositol-kinase domain protein, putative
TCSYLVIO_6052	Tc00.1047053503671.10	Tc00.1047053510325.69	aminopeptidase, putative
TCSYLVIO_6058	Tc00.1047053510325.10	Tc00.1047053508185.19	ubiquitin hydrolase, putative
TCSYLVIO_6081	Tc00.1047053510323.4	Tc00.1047053506699.40	katanin-like protein, putative
TCSYLVIO_6086	Tc00.1047053506699.3	Tc00.1047053510321.20	hypothetical protein
TCSYLVIO_6087	Tc00.1047053510321.10	Tc00.1047053434259.10	hypothetical protein
TCSYLVIO_6088	Tc00.1047053434259.19	Tc00.1047053438897.10	hypothetical protein
TCSYLVIO_6096	Tc00.1047053510317.7	Tc00.1047053506697.80	hypothetical protein
TCSYLVIO_6114	Tc00.1047053506695.4	Tc00.1047053510315.40	hypothetical protein
TCSYLVIO_6151	Tc00.1047053508181.4	Tc00.1047053484949.9	serine/threonine protein kinase, putative
TCSYLVIO_6151	Tc00.1047053484949.9	Tc00.1047053506691.90	serine/threonine protein kinase, putative
TCSYLVIO_6163	Tc00.1047053468941.9	Tc00.1047053510313.20	hypothetical protein
TCSYLVIO_6192	Tc00.1047053424795.10	Tc00.1047053430895.16	hypothetical protein
TCSYLVIO_6194	Tc00.1047053430895.4	Tc00.1047053479253.9	GPR1/FUN34/yaaH family, putative
TCSYLVIO_6211	Tc00.1047053509351.10	Tc00.1047053503577.9	delta-1-pyrroline-5-carboxylate dehydrogenase, putative
TCSYLVIO_6297	Tc00.1047053503745.10	Tc00.1047053412943.9	hypothetical protein
TCSYLVIO_6350	Tc00.1047053506771.9	Tc00.1047053504025.10	hypothetical protein
TCSYLVIO_6351	Tc00.1047053504025.19	Tc00.1047053503779.10	hypothetical protein
TCSYLVIO_6391	Tc00.1047053508549.30	Tc00.1047053508551.10	phosphatidylinositol 3 kinase, putative
TCSYLVIO_6404	Tc00.1047053511041.4	Tc00.1047053508729.18	hypothetical protein
TCSYLVIO_6413	Tc00.1047053508727.9	Tc00.1047053508725.10	hypothetical protein
TCSYLVIO_6414	Tc00.1047053508725.4	Tc00.1047053508723.120	hypothetical protein
TCSYLVIO_6434	Tc00.1047053503535.9	Tc00.1047053508721.20	hypothetical protein
TCSYLVIO_6437	Tc00.1047053508721.4	Tc00.1047053508719.80	hypothetical protein
TCSYLVIO_6445	Tc00.1047053508719.9	Tc00.1047053504171.10	hypothetical protein
TCSYLVIO_6450	Tc00.1047053504171.59	Tc00.1047053504179.100	hypothetical protein
TCSYLVIO_6459	Tc00.1047053504179.9	Tc00.1047053503525.50	RNA helicase, putative
TCSYLVIO_6508	Tc00.1047053504147.10	Tc00.1047053504103.109	hypothetical protein
TCSYLVIO_6532	Tc00.1047053484299.10	Tc00.1047053504507.5	trypanothione reductase, putative
TCSYLVIO_6534	Tc00.1047053504507.20	Tc00.1047053503425.29	DNA replication licensing factor, putative
TCSYLVIO_6570	Tc00.1047053507713.10	Tc00.1047053507711.349	hypothetical protein
TCSYLVIO_6709	Tc00.1047053507639.110	Tc00.1047053507641.14	hypothetical protein
TCSYLVIO_6795	Tc00.1047053510181.9	Tc00.1047053503639.10	myo-inositol-1-phosphate synthase, putative
TCSYLVIO_6835	Tc00.1047053510999.39	Tc00.1047053511001.9	40S ribosomal protein S3a, putative
TCSYLVIO_6864	Tc00.1047053511001.240	Tc00.1047053503841.10	proteasome activator protein PA26, putative
TCSYLVIO_6878	Tc00.1047053461165.4	Tc00.1047053508539.10	hypothetical protein
TCSYLVIO_10610	Tc00.1047053511445.160	Tc00.1047053509015.10	copper-transporting ATPase-like protein, putative
TCSYLVIO_7248	Tc00.1047053503893.181	Tc00.1047053506927.10	hypothetical protein
TCSYLVIO_7252	Tc00.1047053408345.20	Tc00.1047053503793.10	2-oxoglutarate dehydrogenase subunit, putative
TCSYLVIO_7256	Tc00.1047053509829.20	Tc00.1047053506367.10	isovaleryl-coA dehydrogenase, putative
TCSYLVIO_7272	Tc00.1047053506367.180	Tc00.1047053509831.5	vesicular transport protein (CDC48 homologue), putative
TCSYLVIO_7280	Tc00.1047053509833.10	Tc00.1047053506369.9	hypothetical protein
TCSYLVIO_9749	Tc00.1047053506127.9	Tc00.1047053506125.30	phosphoglycerate kinase, putative
TCSYLVIO_9750	Tc00.1047053508271.4	Tc00.1047053504153.10	hypothetical protein
TCSYLVIO_7369	Tc00.1047053506811.10	Tc00.1047053419469.14	kinesin, putative
TCSYLVIO_7379	Tc00.1047053503887.10	Tc00.1047053510431.340	hypothetical protein
TCSYLVIO_7395	Tc00.1047053510431.10	Tc00.1047053408799.19	isopentenyl-diphosphate delta-isomerase, putative
TCSYLVIO_7511	Tc00.1047053506147.9	Tc00.1047053507617.9	prostaglandin F2alpha synthase
TCSYLVIO_7614	Tc00.1047053507011.269	Tc00.1047053510737.10	6-phosphogluconate dehydrogenase, decarboxylating, putative
TCSYLVIO_7625	Tc00.1047053510739.19	Tc00.1047053510741.10	cystathione gamma lyase, putative
TCSYLVIO_7646	Tc00.1047053510741.229	Tc00.1047053510743.10	ubiquitin-activating enzyme E1, putative
TCSYLVIO_7659	Tc00.1047053510743.130	Tc00.1047053508463.10	hypothetical protein
TCSYLVIO_7689	Tc00.1047053508465.149	Tc00.1047053503557.10	hypothetical protein
TCSYLVIO_7696	Tc00.1047053508467.19	Tc00.1047053510747.5	hypothetical protein
TCSYLVIO_7713	Tc00.1047053510747.170	Tc00.1047053510749.4	hypothetical protein
TCSYLVIO_7722	Tc00.1047053510749.99	Tc00.1047053510751.4	aminopeptidase P, putative
TCSYLVIO_7726	Tc00.1047053510751.40	Tc00.1047053508469.4	hypothetical protein
TCSYLVIO_7731	Tc00.1047053508469.59	Tc00.1047053510753.9	helicase, putative
TCSYLVIO_7733	Tc00.1047053510753.30	Tc00.1047053510755.19	hypothetical protein
TCSYLVIO_7752	Tc00.1047053510757.30	Tc00.1047053510759.4	hypothetical protein
TCSYLVIO_9634	Tc00.1047053503651.49	Tc00.1047053510761.4	hypothetical protein
TCSYLVIO_7794	Tc00.1047053510767.69	Tc00.1047053508471.10	hypothetical protein
TCSYLVIO_7825	Tc00.1047053509537.10	Tc00.1047053422041.9	pre-mRNA splicing factor ATP-dependent RNA helicase, putative
TCSYLVIO_7846	Tc00.1047053506553.40	Tc00.1047053510105.9	ATP-dependent DEAD/H RNA helicase, putative
TCSYLVIO_7998	Tc00.1047053506505.50	Tc00.1047053504111.49	hypothetical protein
TCSYLVIO_8014	Tc00.1047053507963.90	Tc00.1047053510029.10	hypothetical protein
TCSYLVIO_8053	Tc00.1047053506211.259	Tc00.1047053503833.10	hypothetical protein
TCSYLVIO_8077	Tc00.1047053509649.59	Tc00.1047053398345.10	hypothetical protein
TCSYLVIO_8289	Tc00.1047053509807.29	Tc00.1047053503457.4	hypothetical protein
TCSYLVIO_8376	Tc00.1047053506543.113	Tc00.1047053430061.9	hypothetical protein
TCSYLVIO_8394	Tc00.1047053504047.70	Tc00.1047053482097.10	hypothetical protein
TCSYLVIO_8467	Tc00.1047053503867.5	Tc00.1047053504005.60	hypothetical protein
TCSYLVIO_8474	Tc00.1047053504005.3	Tc00.1047053511127.5	RNA helicase, putative
TCSYLVIO_8521	Tc00.1047053511127.429	Tc00.1047053508777.10	hypothetical protein
TCSYLVIO_8607	Tc00.1047053510161.10	Tc00.1047053510159.19	hypothetical protein
TCSYLVIO_8932	Tc00.1047053439307.19	Tc00.1047053506753.249	hypothetical protein, conserved
TCSYLVIO_9004	Tc00.1047053508949.50	Tc00.1047053508951.4	protein kinase, putative
TCSYLVIO_9013	Tc00.1047053508951.90	Tc00.1047053506493.9	hypothetical protein
TCSYLVIO_9055	Tc00.1047053507997.89	Tc00.1047053506529.14	hypothetical protein
TCSYLVIO_9132	Tc00.1047053510075.60	Tc00.1047053506531.9	hypothetical protein
TCSYLVIO_9221	Tc00.1047053505977.13	Tc00.1047053504449.40	protein kinase, putative
TCSYLVIO_9224	Tc00.1047053504449.14	Tc00.1047053505983.40	hypothetical protein
TCSYLVIO_9227	Tc00.1047053505983.9	Tc00.1047053487507.10	tryparedoxin peroxidase, putative
TCSYLVIO_9230	Tc00.1047053509445.39	Tc00.1047053505843.10	glutamate dehydrogenase, putative
TCSYLVIO_9286	Tc00.1047053508129.9	Tc00.1047053461927.9	adenosine monophosphate deaminase, putative
TCSYLVIO_9405	Tc00.1047053511417.129	Tc00.1047053511419.4	hypothetical protein
TCSYLVIO_9451	Tc00.1047053503805.3	Tc00.1047053503803.20	kinesin heavy chain, putative
TCSYLVIO_9453	Tc00.1047053503803.4	Tc00.1047053511425.10	serine/threonine protein phosphatase 2A regulatory subunit, putative
TCSYLVIO_9457	Tc00.1047053511425.49	Tc00.1047053511427.10	hypothetical protein
TCSYLVIO_9466	Tc00.1047053508995.69	Tc00.1047053442629.9	hypothetical protein
TCSYLVIO_9474	Tc00.1047053504247.79	Tc00.1047053511429.10	hypothetical protein
TCSYLVIO_9493	Tc00.1047053511435.49	Tc00.1047053508997.20	phosphatidylinositol 3-kinase, putative
TCSYLVIO_9507	Tc00.1047053510957.9	Tc00.1047053506563.220	calpain-like cysteine peptidase, putative
TCSYLVIO_9524	Tc00.1047053506563.4	Tc00.1047053510955.60	hypothetical protein
TCSYLVIO_9530	Tc00.1047053510955.4	Tc00.1047053510953.49	lipase

## Sheet: Incorrect pseudogenes
Incorrect pseudogenes in CL Brener
Tc00.1047053506989.100
Tc00.1047053508175.133
Tc00.1047053510359.120
Tc00.1047053511361.10
Tc00.1047053511189.50
Tc00.1047053507895.100
Tc00.1047053507093.150
Tc00.1047053510043.20
Tc00.1047053503779.80
Tc00.1047053509991.40
Tc00.1047053511295.60
Tc00.1047053507647.20
Tc00.1047053508153.940
Tc00.1047053503869.60
Tc00.1047053509967.100
Tc00.1047053503485.20
Tc00.1047053506989.240
Tc00.1047053509761.20
Tc00.1047053506251.130
Tc00.1047053511367.159
Tc00.1047053507221.60
Tc00.1047053504883.70
Tc00.1047053509047.80
Tc00.1047053511071.50
Tc00.1047053510889.160
Tc00.1047053505999.189
Tc00.1047053507513.130
Tc00.1047053507491.70
Tc00.1047053504123.50
Tc00.1047053509109.170
Tc00.1047053504231.5
Tc00.1047053508879.130
Tc00.1047053503885.30
Tc00.1047053507531.10
Tc00.1047053508469.50
Tc00.1047053506485.40
Tc00.1047053503901.9
Tc00.1047053511715.50
Tc00.1047053510407.60
Tc00.1047053508235.40
Tc00.1047053503865.80
Tc00.1047053510055.130
Tc00.1047053511461.60
Tc00.1047053511751.191
Tc00.1047053503479.20
Tc00.1047053452283.10
Tc00.1047053503981.9
Tc00.1047053511237.30
Tc00.1047053509473.10
Tc00.1047053504643.10
Tc00.1047053510523.10
Tc00.1047053503931.46
Tc00.1047053510769.60
Tc00.1047053511903.140
Tc00.1047053509337.28
Tc00.1047053506927.10
Tc00.1047053511277.30
Tc00.1047053505987.10
Tc00.1047053506943.150
Tc00.1047053511423.130
Tc00.1047053509669.120
Tc00.1047053504143.30
Tc00.1047053507011.230
Tc00.1047053507031.170
Tc00.1047053511751.240
Tc00.1047053510897.70
Tc00.1047053509693.20
Tc00.1047053424123.10
Tc00.1047053503913.4
Tc00.1047053508273.10
Tc00.1047053406377.10
Tc00.1047053506525.45
Tc00.1047053504703.10
Tc00.1047053511903.300
Tc00.1047053507007.99
Tc00.1047053509575.50
Tc00.1047053503785.10
Tc00.1047053509243.40
Tc00.1047053510101.230
Tc00.1047053509491.20
Tc00.1047053432787.10
Tc00.1047053507787.50
Tc00.1047053402647.9
Tc00.1047053511515.20
Tc00.1047053507063.240
Tc00.1047053509671.130
Tc00.1047053507801.114
Tc00.1047053508153.520
Tc00.1047053506699.34
Tc00.1047053504033.140
Tc00.1047053510105.140
Tc00.1047053506925.250
Tc00.1047053510657.70
Tc00.1047053511239.159
Tc00.1047053507943.80
Tc00.1047053506895.60
Tc00.1047053508817.90
Tc00.1047053509965.229
Tc00.1047053504247.70
Tc00.1047053506513.170
Tc00.1047053508891.80
Tc00.1047053510515.20
Tc00.1047053508265.60
Tc00.1047053510741.190
Tc00.1047053503797.7
Tc00.1047053505555.10
Tc00.1047053509991.70
Tc00.1047053508781.129
Tc00.1047053506359.30
Tc00.1047053511885.10
Tc00.1047053506977.110
Tc00.1047053510997.50
Tc00.1047053508181.90
Tc00.1047053511807.210
Tc00.1047053503831.40
Tc00.1047053506519.140
Tc00.1047053437545.10
Tc00.1047053506195.100
Tc00.1047053503733.50
Tc00.1047053508625.100
Tc00.1047053508403.20
Tc00.1047053508999.230
Tc00.1047053508131.10
Tc00.1047053511109.50
Tc00.1047053508659.40
Tc00.1047053505965.92
Tc00.1047053510659.140
Tc00.1047053506435.70
Tc00.1047053506855.240
Tc00.1047053506155.90
Tc00.1047053503465.20
Tc00.1047053506445.40
Tc00.1047053507027.30
Tc00.1047053506945.140
Tc00.1047053508911.30
Tc00.1047053510491.30
Tc00.1047053412093.10
Tc00.1047053506657.50
Tc00.1047053504045.90
Tc00.1047053503989.30
Tc00.1047053510645.40
Tc00.1047053511027.29
Tc00.1047053511655.50
Tc00.1047053507007.9
Tc00.1047053507723.70
Tc00.1047053508621.30
Tc00.1047053504093.10
Tc00.1047053506779.30
Tc00.1047053506435.230
Tc00.1047053510241.130
Tc00.1047053510665.60
Tc00.1047053507795.60
Tc00.1047053510335.30
Tc00.1047053510531.90
Tc00.1047053511417.120
Tc00.1047053506513.130
Tc00.1047053511209.30
Tc00.1047053511277.520
Tc00.1047053509891.20
Tc00.1047053508277.269
Tc00.1047053508891.120
Tc00.1047053511275.10
Tc00.1047053508181.30
Tc00.1047053503797.20
Tc00.1047053509717.9
Tc00.1047053511299.35
Tc00.1047053504131.10
Tc00.1047053507037.10
Tc00.1047053504125.100
